# Supplementary material for: Initial dissolution of D2O at the gas–liquid interface of the ionic liquid [C4min][NTf2] associated with hydrogen-bond network formation
Source: Royal Society of Chemistry journal article supplement (doi:10.1039/c6cp03448a), 2016-01-01
Supplement: c6cp03448a1.pdf [file c6cp03448a1.pdf]

## Electronic Supplementary Information

# Initial dissolution of $D_2O$ at the gas-liquid interface of ionic liquid [C<sub>4</sub>min][NTf<sub>2</sub>] associated with hydrogen-bond network formation

H. Ohoyama,<sup>a\*</sup> T. Teramoto<sup>b</sup>

<sup>a</sup>Department of Chemistry, Graduate School of Science, Osaka University, Toyonaka, Osaka 560-0043, Japan

<sup>b</sup>Department of Electrical & Electronic Engineering, College of Science & Engineering, Ritsumeikan University, Kusatsu, Shiga 525-8577, Japan

## 1 Experimental details

### 1-1. Generation and characterization of a flowing jet sheet beam (FJSB) of ionic liquid (IL) [C<sub>4</sub>min] [NTf<sub>2</sub>]

In order to study the initial dissolution process at the gas-liquid interface, we generated a flowing jet sheet beam (FJSB) of ionic liquid (IL) [C<sub>4</sub>min] [NTf<sub>2</sub>] under vacuum. Fig. S1 shows the home-made nozzle tip having a trapezoidally-shaped groove on the inside and a conically-shaped hole on the outside, which can provide a FJSB of [C<sub>4</sub>min] [NTf<sub>2</sub>] with high optical quality as excellent as an interference pattern can be observed. The circulation of IL was operated by a vacuum compliant magnetic coupled gear pump with a flowmeter. Because the viscosity of IL is sensitive to temperature, a temperature-controlled water circulating system was used in order to keep the IL beam condition constant. The temperature of IL is variable within the range of 278 - 323 K.

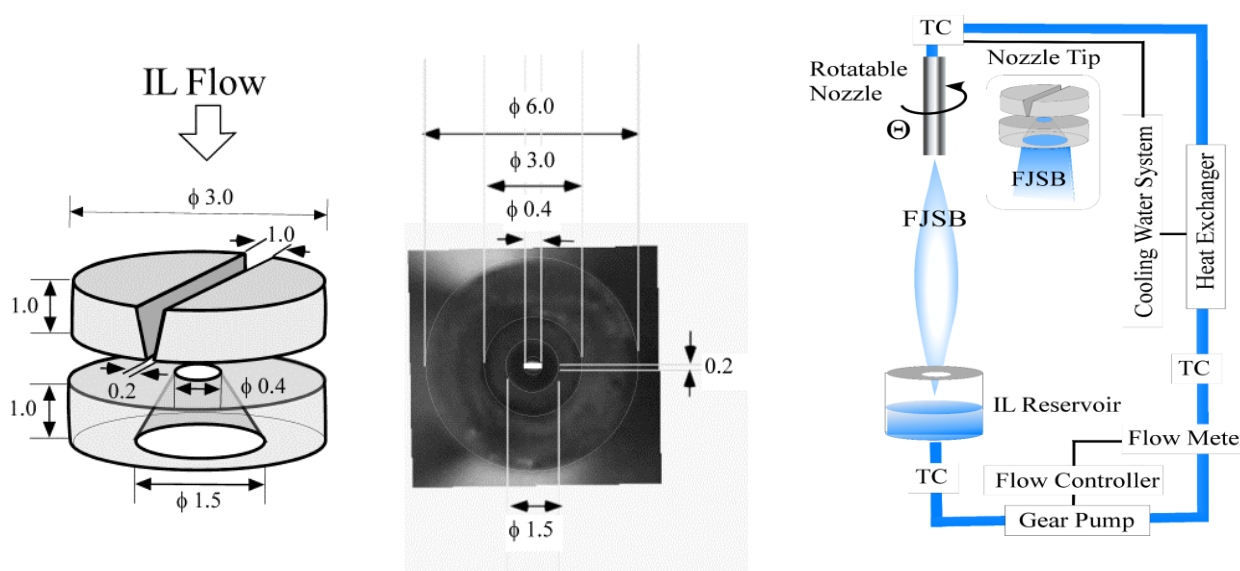

Fig. S1 (left) Schematic view and photograph of the nozzle tip, which consists of a trapezoidally-shaped groove on the inside and a conically-shaped hole on the outside, and (right) the experimental setup of FJSB generation.

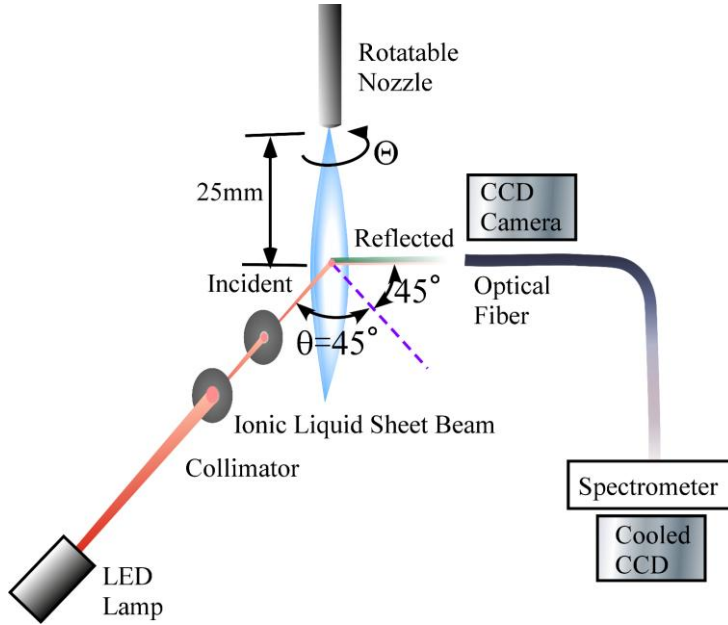

Fig. S2 Experimental setup for measuring an interferometric reflection spectrum.

Fig. S2 shows the experimental setup for measuring an interferometric reflection spectrum for which collimated white LED light is irradiated on FJSB with a spot diameter of  $\sim 1$  mm at an incident angle of  $45^\circ$ . The reflection spectrum was measured by a TE cooled CCD spectrometer coupled with a fiber optics (Glacier X, Konica Minolta). The characterization of FJSB of IL was carried out by observing an interferometric reflection spectrum (see Fig.S3) from the surface of FJS. The thickness of FJS can be determined from the reflectance spectrum using the following relationship.

$$d = \frac{\Delta m}{2\sqrt{n^2 - \sin^2\theta}} \times \frac{1}{\left(\frac{1}{\lambda_2} - \frac{1}{\lambda_1}\right)} \quad (1)$$

where  $d$  is the thickness of FJS,  $\Delta m$  is the number of peaks (and/or valleys) in fringe pattern within the measurement wavelength range,  $n$  is the refractive index of IL [C<sub>4</sub>min] [NTf<sub>2</sub>] (1.42),  $\theta$  is the incident angle of the light against surface normal ( $45^\circ$ ),  $\lambda_1$  and  $\lambda_2$  is the initial and final wavelength at the peaks observed in the fringe pattern, respectively. Fig. S3 shows the observed  $(1/\lambda_2 - 1/\lambda_1)$  term as a function of  $\Delta m$ . As can be seen in Fig. S3, a linear relationship between  $(1/\lambda_2 - 1/\lambda_1)$  and  $\Delta m$  is recognized as with eq. (1). Therefore, the thickness of FJS can be determined from the gradient of straight line. The FJSB of IL [C<sub>4</sub>min] [NTf<sub>2</sub>] operated with a flow rate of  $1.10 \text{ mLs}^{-1}$  at a temperature of  $298 \pm 1 \text{ K}$  is characterized as a thickness of  $3.4 \pm 0.1 \mu\text{m}$ , width of 11 mm at 25 mm downstream from the nozzle. According to the thickness and the flow rate of FJS, the flow velocity is estimated to be  $\sim 10 \text{ ms}^{-1}$ , which corresponds to a contact time of  $\sim 100 \mu\text{s}$  with D<sub>2</sub>O molecular beam.

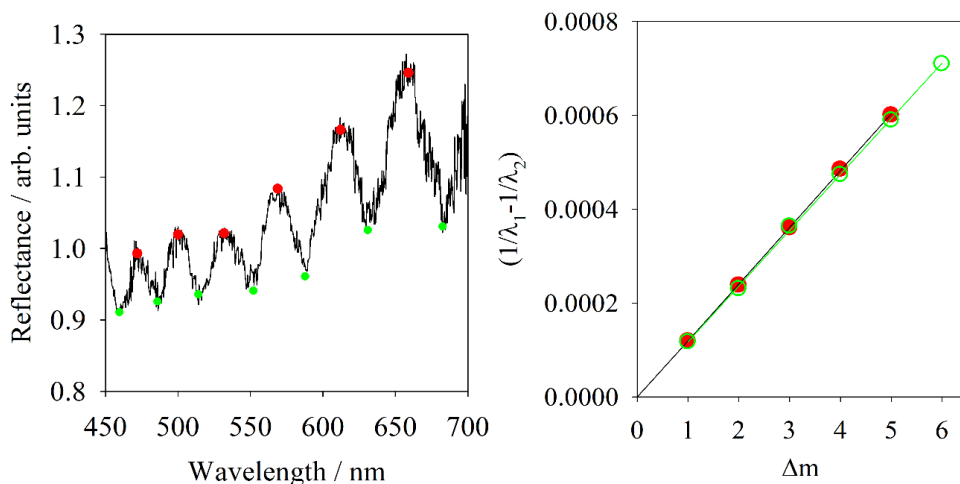

Fig. S3 (left) A typical reflectance spectrum of the FJSB of [C<sub>4</sub>min] [NTf<sub>2</sub>] observed with a flow rate of 1.10 mLs<sup>-1</sup> at a temperature of 298 ± 1 K. (right) The observed  $(1/\lambda_2 - 1/\lambda_1)$  term as a function of  $\Delta m$ , characterizing a thickness of 3.4 ± 0.1 μm, width of 11 mm at 25 mm downstream from the nozzle.

## 1-2 Characterization of D<sub>2</sub>O molecular beam

In order to change the collision energy, the seeding of D<sub>2</sub>O by Rg was performed by the bubbling of Rg into D<sub>2</sub>O reservoir. The velocity distribution of D<sub>2</sub>O molecular beams were determined by using a conventional time-of-flight method with a flight length of 2080mm. The time-of-flight spectra and the resultant velocity distributions are shown in Fig. S4. They are characterized by a shifted-Maxwell-Boltzmann distribution with two parameters,  $v_s$  and  $\alpha_s$ , summarizing in table 1 with collision energy ( $E_{col}$ ). The pulsed D<sub>2</sub>O molecular beam with a pulse duration of 0.3 ms (FWHM) is operated at a stagnation pressure of 250 Torr with a repetition rate of 10 Hz. The stagnation pressure of D<sub>2</sub>O molecular beam is automatically regulated within a fluctuation of less than 0.5 % by using a gas reservoir which is equipped with an electric on-off valve operated by the output from a pressure gauge for the regulation of gas flow rate from Rg cylinder.

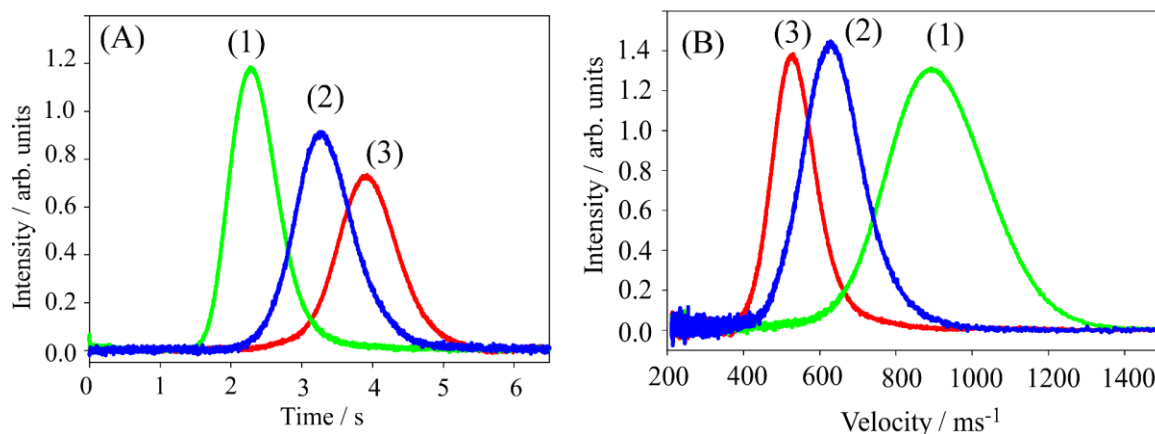

Fig.S4 (A) Time-of-flight spectra of D<sub>2</sub>O molecular beams seeded in rare gas (Rg), and (B) the velocity distributions at three beam conditions

**Table 1** Velocity distribution of D<sub>2</sub>O molecular beams seeded in rare gas (Rg)

| Rg               | $v_s$ /ms <sup>-1</sup> | $\alpha_s$ /ms <sup>-1</sup> | $E_{col}$ / eV |
|------------------|-------------------------|------------------------------|----------------|
| (1) He           | 895                     | 299                          | 0.083          |
| (2) He + Ar(1:1) | 636                     | 181                          | 0.042          |
| (3) Ar           | 529                     | 133                          | 0.029          |

### 1-3. Experimental apparatus for the King and Wells (K-W) method.

The experimental setup for the King and Wells (K-W) method is shown in Fig. S5. The apparatus consists of four chambers: The D<sub>2</sub>O molecular beam source chamber, first buffer chamber, second buffer chamber in which beam-stop (BS) is mounted, the ionic liquid (IL) chamber in which beam-flag (BF) and a quadrupole mass spectrometer (QMS) is mounted for the dissolution analysis by KW method. By using FJSB, the contact time of D<sub>2</sub>O beam on IL is reduced to be  $\sim 100 \mu\text{s}$  and the exposure time can be reduced to be  $\sim 2 \text{ ms}$  after collision as a travelling time of FJSB to the IL reservoir lying downstream. Therefore, the initial dissolution is defined as the process in which D<sub>2</sub>O molecules can't desorb from IL interface within an exposure time of 2 ms after the collision. The experiments were performed by using a FJSB of [C<sub>4</sub>min] [NTf<sub>2</sub>] and a pulsed D<sub>2</sub>O molecular beam seeded in rare gas (Rg), and the measurement of the dissolution probability (S) by using the King and Wells (K-W) method.<sup>25</sup> The introduction of D<sub>2</sub>O molecular beam into IL chamber was modulated by the beam-stop (BS). The introduction of D<sub>2</sub>O molecular beam onto FJSB is modulated by the beam-Flag (BF). After 3-stage differential pumping, the D<sub>2</sub>O molecular beam introduces into the IL chamber. The surface of FJSB is rotatable against the D<sub>2</sub>O molecular beam axis by rotating the IL nozzle. The incident angle ( $\Theta$ ) is defined as the angle between the surface normal of FJSB and the D<sub>2</sub>O molecular beam axis. The pulsed D<sub>2</sub>O molecular beam with pulse duration of 0.3 ms (FWHM) is operated at a stagnation pressure of 250 Torr with a repetition rate of 10 Hz. The base pressure of the IL chamber under the operation of the FJS of IL is below  $5 \times 10^{-5} \text{ Pa}$ .

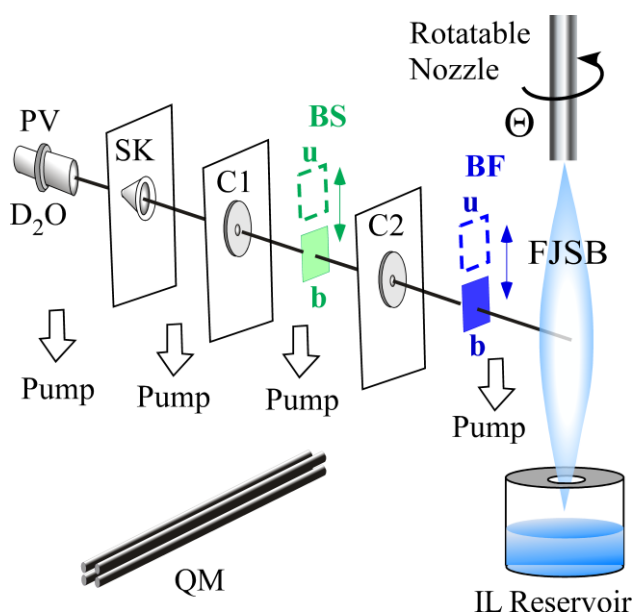

Fig.S5 Experimental setup for measuring the initial gas dissolution by the King and Wells (K-W) method.

## 2. Physical properties (viscosity, density, surface tension) of the IL [C<sub>4</sub>min] [NTf<sub>2</sub>]

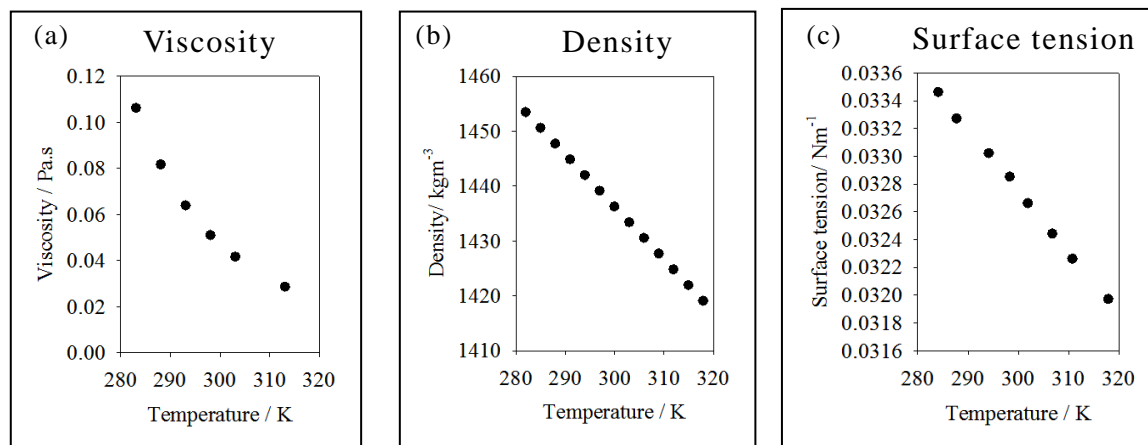

Fig. S6 The literature data on physical properties (viscosity, density, surface tension) of the IL [C<sub>4</sub>min] [NTf<sub>2</sub>]: (a) Viscosity from ref. S1, (b) Density from ref. S2, (c) Surface tension from ref. S3.

### References

- <sup>S1</sup> K. R., Harris, M. Kanakubo, L. A. Woolf, *J. Chem. Eng. Data*, 2007, **52**, 1080-1085.
- <sup>S2</sup> R. Hamidova, I. Kul, J. Safav, A. Shahverdiyev, E. Hassel, *J. Chem. Eng.*, 2015, **32**, 303-316.
- <sup>S3</sup> J. Klomfar, M. Souckova, J. Patek, *J. Chem. Thermodyn.*, 2010, **42**, 323-329.
